# Supplementary material for: Lectin-Based Immunophenotyping and Whole Proteomic Profiling of CT-26 Colon Carcinoma Murine Model
Source: Int J Mol Sci. 2024 Apr 4;25(7):4022. doi: 10.3390/ijms25074022 (PMC11012250; doi:10.3390/ijms25074022)
Supplement: Supplementary file 1 [file ijms-25-04022-s001.zip]

Archive with 8 entries (8 files):
- Supplementary Table3_4.xlsx
- Supplementary Table5_6.xlsx
- SupplementaryFigure1.tif
- SupplementaryFigure2.tif
- SupplementaryFigure3.tif
- SupplementaryTable1.tif
- SupplementaryTable2.tif
- Supplementary_Figure_Legend.pdf
